# Supplementary material
Source: Springer Nature journal article supplement (https://www.springermedizin.de/resource/supplementary/12883_2009_277_MOESM4_ESM.pdf/9457224)

**1. CNS infection/  
immune activation**

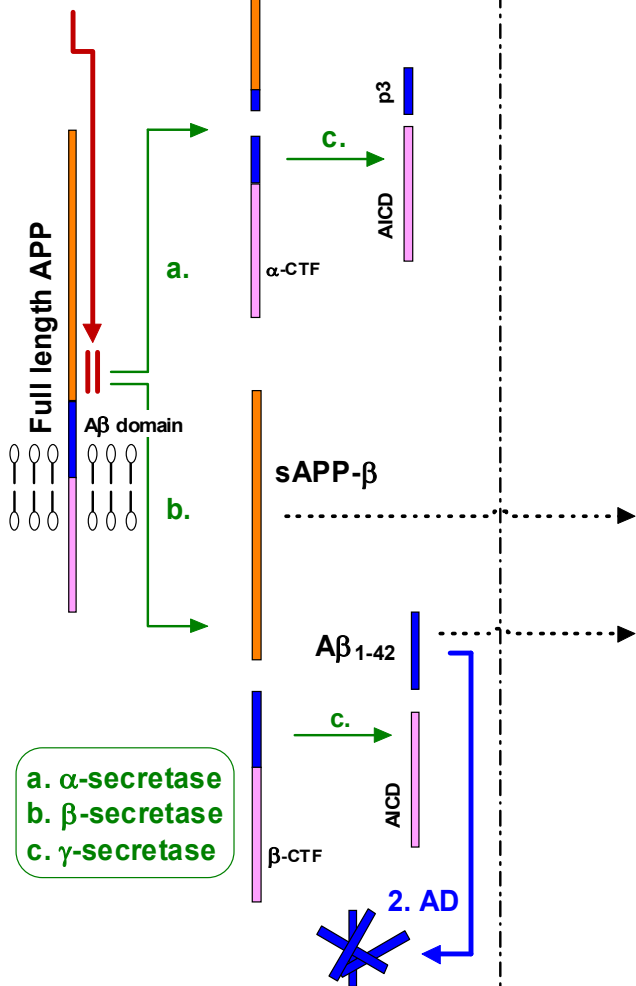

Supplement: MOESM4 [file 9457224]
